# Supplementary material
Source: Springer Nature journal article supplement (https://www.springermedizin.de/resource/supplementary/12881_2010_738_MOESM2_ESM.pdf/9451408)

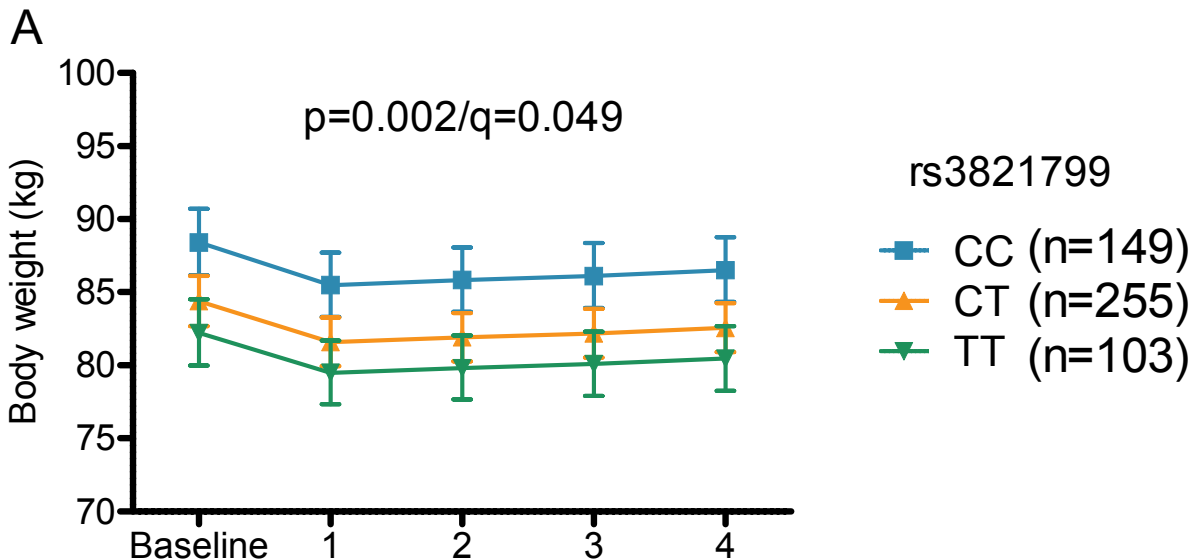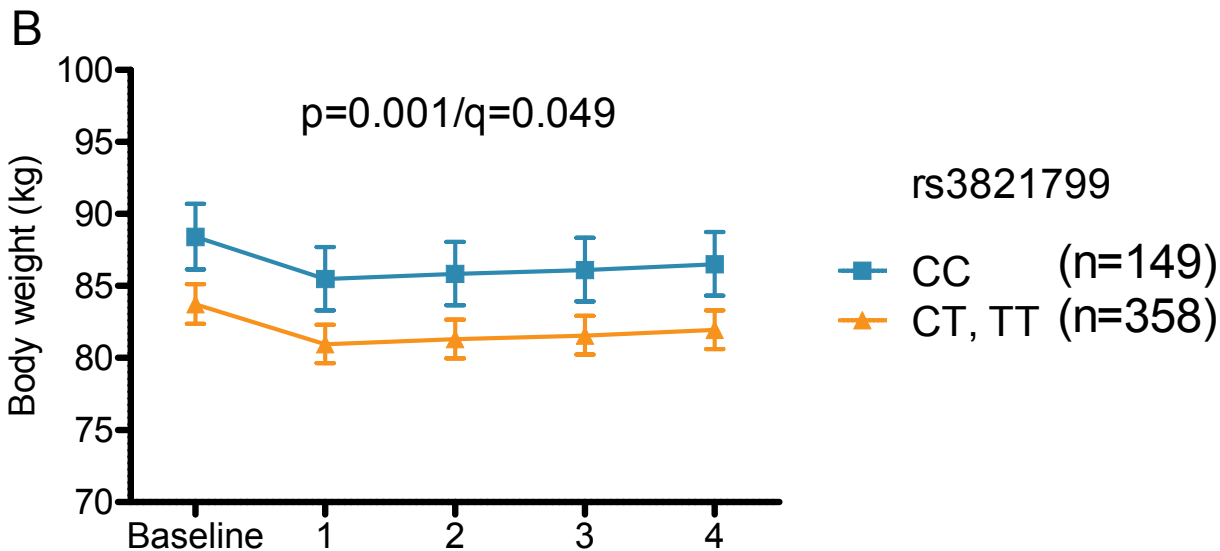

Supplement: MOESM2 [file 9451408]
